# Supplementary material for: Effect of Laparoscopic Roux-en-Y Gastric Bypass Surgery on Obstructive Sleep Apnea in a Chinese Population with Obesity and T2DM
Source: Springer Nature journal article supplement (doi:10.1007/s11695-014-1510-9), 2014-11-14
Supplement: MOESM1 [file 9039196]

Supplementary table 1. Comparisons of the percent change of the parameters between the cured group and the uncured group

| parameters | Cured group (n=28)          |                            | Uncured group (n=16)        |                            | p-value* |
|------------|-----------------------------|----------------------------|-----------------------------|----------------------------|----------|
|            | Mean difference<br>(95% CI) | Percent change<br>(95% CI) | Mean difference<br>(95% CI) | Percent change<br>(95% CI) |          |
| Total AHI  | -15.6<br>(-21.4 to -9.9)    | 82.15<br>(74.83 to 89.48)  | -14.9<br>(-25.0 to -4.9)    | 36.32<br>(15.30 to 57.35)  | <0.001   |
| Age        | 0.8<br>(0.7 to 1.0)         | 1.42<br>(0 to 2.84)        | 0.8<br>(0.6 to 1.0)         | 2.02<br>(0.20 to 3.85)     | 0.253    |
| Weight     | -18.8<br>(-21.6 to -16.0)   | 21.38<br>(18.47 to 21.29)  | -17.7<br>(-20.6 to -14.9)   | 20.47<br>(17.52 to 23.41)  | 0.603    |
| BMI        | -6.8<br>(-7.8 to -5.8)      | 21.38<br>(18.47 to 24.28)  | -6.5<br>(-7.5 to -5.4)      | 20.47<br>(17.52 to 23.41)  | 0.604    |
| NC         | -4.1<br>(-5.2 to -3.1)      | 10.06<br>(7.55 to 12.57)   | -5.1<br>(-6.4 to -3.8)      | 12.61<br>(9.55 to 15.67)   | 0.268    |
| WC         | -16.9<br>(-20.1 to -13.6)   | 15.85<br>(12.95 to 18.75)  | -18.3<br>(-22.2 to -14.3)   | 16.82<br>(13.54 to 20.09)  | 0.745    |
| HC         | -12.0<br>(-14.4 to -9.5)    | 10.87<br>(8.71 to 13.02)   | -13.8<br>(-17.0 to -10.7)   | 12.45<br>(9.86 to 15.04)   | 0.372    |
| Glucose    | -2.3<br>(-3.1 to -1.5)      | 24.98<br>(16.96 to 33.00)  | -2.9<br>(-4.2 to -1.6)      | 28.60<br>(18.45 to 38.74)  | 0.614    |
| Insulin    | -12.4<br>(-17.4 to -7.5)    | 55.70<br>(46.08 to 65.31)  | -14.8<br>(-24.4 to -5.2)    | 55.44<br>(42.16 to 68.72)  | 0.904    |
| IR         | -1.3<br>(-1.5 to -1.1)      | 80.42<br>(65.04 to 95.79)  | -1.3<br>(-1.7 to -1.0)      | 75.31<br>(60.36 to 90.26)  | 0.635    |

\*p-value for the comparison of percent change between the cured group and the uncured group.

AHI=apnoea-hypopnoea index; BMI=body mass index; NC=neck circumference; WC=waist circumference; HC=hip circumference; IR=insulin resistance index
