# Supplementary material for: Effect of Laparoscopic Roux-en-Y Gastric Bypass Surgery on Obstructive Sleep Apnea in a Chinese Population with Obesity and T2DM
Source: Springer Nature journal article supplement (doi:10.1007/s11695-014-1510-9), 2014-11-14
Supplement: MOESM2 [file 9039196]

Supplementary table 2. Comparisons of data between the improved group and the unimproved group

| parameters | Improved group (n=35) |                 |                           | Unimproved group (n=9) |                |                           | p-value& | p-value* |
|------------|-----------------------|-----------------|---------------------------|------------------------|----------------|---------------------------|----------|----------|
|            | PRE (SD)              | POST (SD)       | Mean difference (95% CI)  | PRE (SD)               | POST (SD)      | Mean difference (95% CI)  |          |          |
| Total AHI  | 22.7<br>(18.9)        | 3.9<br>(4.5)#   | -18.7<br>(-24.4 to -13.1) | 21.5<br>(13.6)         | 19.2<br>(13.5) | -2.3<br>(-6.2 to 1.6)     | 0.749    | <0.001   |
| Age        | 47.2<br>(11.5)        | 48.0<br>(11.6)  | 0.8<br>(0.7 to 1.0)       | 51.0<br>(9.2)          | 51.7<br>(9.3)  | 0.7<br>(0.5 to 0.9)       | 0.362    | 0.549    |
| Weight     | 86.8<br>(13.3)        | 68.0<br>(11.2)# | -18.8<br>(-21.2 to -16.4) | 84.3<br>(10.4)         | 67.5<br>(8.9)# | -16.8<br>(-20.2 to -13.4) | 0.607    | 0.428    |
| BMI        | 31.2<br>(3.5)         | 24.4<br>(2.8)#  | -6.8<br>(-7.7 to -5.9)    | 30.7<br>(3.2)          | 24.5<br>(2.2)# | -6.2<br>(-7.6 to -4.8)    | 0.695    | 0.391    |
| NC         | 39.7<br>(3.2)         | 35.5<br>(3.7)#  | -4.3<br>(-5.3 to -3.3)    | 39.1<br>(1.4)          | 33.9<br>(1.7)# | -5.2<br>(-5.9 to -4.4)    | 0.548    | 0.100    |
| WC         | 105.2<br>(10.4)       | 87.8<br>(9.7)#  | -17.4<br>(-20.4 to -14.4) | 104.4<br>(6.6)         | 87.2<br>(6.5)# | -17.2<br>(-20.4 to -14.0) | 0.837    | 0.884    |
| HC         | 108.2<br>(8.6)        | 95.6<br>(7.0)#  | -12.6<br>(-14.8 to -10.3) | 107.7<br>(9.2)         | 94.8<br>(6.4)# | -12.9<br>(-16.5 to -9.3)  | 0.881    | 0.953    |
| Glucose    | 8.1<br>(2.4)          | 5.7<br>(1.2)#   | -2.4<br>(-3.1 to -1.7)    | 8.9<br>(2.8)           | 6.0<br>(1.2)#  | -2.9<br>(-5.0 to -0.7)    | 0.389    | 0.850    |
| Insulin    | 18.6<br>(13.7)        | 7.1<br>(4.6)#   | -11.5<br>(-15.7 to -7.3)  | 28.5<br>(26.7)         | 8.2<br>(6.1)#  | -20.2<br>(-37.1 to -3.3)  | 0.127    | 0.239    |
| IR         | 1.7<br>(0.6)          | 0.4<br>(0.6)#   | -1.3<br>(-1.4 to -1.1)    | 2.0<br>(0.9)           | 0.6<br>(0.7)#  | -1.4<br>(-2.0 to -1.0)    | 0.173    | 0.274    |

# Comparisons between the preoperative and postoperative parameters in the improved group or unimproved group.

& Comparisons of the preoperative parameters between the improved group and unimproved group.

\* Comparisons between the mean differences of the parameters of the improved group and unimproved group.

PRE=preoperative; POST=postoperative; AHI=apnoea-hypopnoea index; BMI=body mass index; NC=neck circumference; WC=waist circumference; HC=hip circumference
