# Supplementary material for: Effect of Laparoscopic Roux-en-Y Gastric Bypass Surgery on Obstructive Sleep Apnea in a Chinese Population with Obesity and T2DM
Source: Springer Nature journal article supplement (doi:10.1007/s11695-014-1510-9), 2014-11-14
Supplement: MOESM3 [file 9039196]

Supplementary table 3. Comparisons of the percent change of the parameters between the improved group and the unimproved group

| parameters | Improved group (n=35)       |                            | Unimproved group (n=9)      |                            | p-value* |
|------------|-----------------------------|----------------------------|-----------------------------|----------------------------|----------|
|            | Mean difference<br>(95% CI) | Percent change<br>(95% CI) | Mean difference<br>(95% CI) | Percent change<br>(95% CI) |          |
| Total AHI  | -18.7<br>(-24.4 to -13.1)   | 80.38<br>(74.48 to 86.29)  | -2.3<br>(-6.2 to 1.6)       | 8.93<br>(-14.8 to 32.66)   | <0.001   |
| Age        | 0.8<br>(0.7 to 1.0)         | 1.85<br>(1.47 to 2.24)     | 0.7<br>(0.5 to 0.9)         | 1.47<br>(1.08 to 1.85)     | 0.140    |
| Weight     | -18.8<br>(-21.2 to -16.4)   | 21.49<br>(19.03 to 23.95)  | -16.8<br>(-20.2 to -13.4)   | 19.92<br>(16.72 to 23.12)  | 0.534    |
| BMI        | -6.8<br>(-7.7 to -5.9)      | 21.49<br>(19.02 to 23.95)  | -6.2<br>(-7.6 to -4.8)      | 19.92<br>(16.72 to 23.12)  | 0.535    |
| NC         | -4.3<br>(-5.3 to -3.3)      | 10.70<br>(8.35 to 13.04)   | -5.2<br>(-5.9 to -4.4)      | 13.23<br>(11.26 to 15.20)  | 0.284    |
| WC         | -17.4<br>(-20.4 to -14.4)   | 16.34<br>(13.76 to 18.91)  | -17.2<br>(-20.4 to -14.0)   | 16.48<br>(13.62 to 19.34)  | 0.956    |
| HC         | -12.6<br>(-14.8 to -10.3)   | 11.44<br>(9.52 to 13.35)   | -12.9<br>(-16.5 to -9.3)    | 11.81<br>(9.06 to 14.56)   | 0.850    |
| glucose    | -2.4<br>(-3.1 to -1.7)      | 26.20<br>(19.45 to 32.94)  | -2.9<br>(-5.0 to -0.7)      | 28.17<br>(12.66 to 43.69)  | 0.790    |
| Insulin    | -11.5<br>(-15.7 to -7.3)    | 54.52<br>(46.06 to 62.97)  | -20.2<br>(-37.1 to -3.3)    | 61.94<br>(44.64 to 79.24)  | 0.981    |
| IR index   | -1.3<br>(-1.4 to -1.1)      | 79.10<br>(66.48 to 91.72)  | -1.4<br>(-2.0 to -1.0)      | 76.81<br>(56.72 to 96.91)  | 0.864    |

\*p-value for the comparison of percent change between the improved group and the unimproved group.

AHI=apnoea-hypopnoea index; BMI=body mass index; NC=neck circumference; WC=waist circumference; HC=hip circumference; IR=insulin resistance
